# Supplementary material for: Independent transcriptional reprogramming and apoptosis induction by cisplatin
Source: PubMed Central journal article supplement — Cell Cycle. 2012 Sep 15;11(18):3472–80. doi: 10.4161/cc.21789 (PMC3466557; doi:10.4161/cc.21789), 2012-09-15
Supplement: cc-11-3472-s01.pdf [file cc-11-3472-s01.pdf]

## **Supplemental Material to:**

**Lorenzo Galluzzi, Ilio Vitale, Laura Senovilla,  
Tobias Eisenberg, Didac Carmona-Gutierrez,  
Erika Vacchelli, Thomas Robert, Hugues Ripoche,  
Nora Jägemann, Caroline Paccard, Nicolas Servant,  
Philippe Hupé, Vladimir Lazar, Philippe Dessen,  
Emmanuel Barillot, Hans Zischka, Frank Madeo  
and Guido Kroemer**

**Independent transcriptional reprogramming  
and apoptosis induction by cisplatin**

**2012; 11(18)**

**<http://dx.doi.org/10.4161/cc.21789>**

**<http://www.landesbioscience.com/journals/cc/article/21789>**

## **Legends to Supplementary Items**

***Supplementary Table 1. *Saccharomyces cerevisiae* knockout strains used in this study.***

***Supplementary Spreadsheet 1. Raw transcriptional signatures of A549 cells responding to cisplatin (CDDP), C2-ceramide (C2-CER) and cadmium dichloride (CdCl<sub>2</sub>).***

***Supplementary Spreadsheet 2. Non-overlapping transcriptional signatures of A549 cells responding to cisplatin (CDDP), C2-ceramide (C2-CER) and cadmium dichloride (CdCl<sub>2</sub>).***

***Supplementary Spreadsheet 3. Overlaps between the transcriptional signatures of A549 cells responding to cisplatin (CDDP), C2-ceramide (C2-CER) and cadmium dichloride (CdCl<sub>2</sub>).***

***Supplementary Spreadsheet 4. Time-correlated transcriptional signatures of A549 cells responding to cisplatin (CDDP), C2-ceramide (C2-CER) and cadmium dichloride (CdCl<sub>2</sub>).***

***Supplementary Spreadsheet 5. Transcriptional modulation of functional cisplatin-response modifiers (CRMs) in A549 cells responding to cisplatin (CDDP), C2-ceramide (C2-CER) and cadmium dichloride (CdCl<sub>2</sub>).***

***Supplementary Spreadsheet 6. Gene Ontology (GO) analysis of the transcriptional signatures elicited in A549 cells by cisplatin (CDDP), C2-ceramide (C2-CER) and***

**cadmium dichloride (CdCl<sub>2</sub>).**

*Supplementary Spreadsheet 7. Kyoto Encyclopedia of Genes and Genomes (KEGG)*  
**analysis of the transcriptional signatures elicited in A549 cells by cisplatin (CDDP),  
C2-ceramide (C2-CER) and cadmium dichloride (CdCl<sub>2</sub>).**

**Supplementary Table 1. *Saccharomyces cerevisiae* knockout strains used in this study.**

| Strain                                                      | Ploidy  | Notes                                                                                                                                                                                                                                                                                       | Ref.         |
|-------------------------------------------------------------|---------|---------------------------------------------------------------------------------------------------------------------------------------------------------------------------------------------------------------------------------------------------------------------------------------------|--------------|
| <i>Parental strains</i>                                     |         |                                                                                                                                                                                                                                                                                             |              |
| <b>BY4741</b>                                               | Haploid | <i>MATa; his3Δ1; leu2Δ0; met15Δ0; ura3Δ0</i>                                                                                                                                                                                                                                                | 1,2          |
| <b>BY4743</b>                                               | Diploid | <i>MATa/MATα; his3Δ1/his3Δ1; leu2Δ0/leu2Δ0; MET15/met15Δ0; LYS2/lys2Δ0; ura3Δ0/ura3Δ0</i>                                                                                                                                                                                                   | 1,2          |
| <b>BY4741</b>                                               | Haploid | <i>rho<sup>0</sup></i>                                                                                                                                                                                                                                                                      | 3            |
| <i>Knockout strains - General apoptosis-related factors</i> |         |                                                                                                                                                                                                                                                                                             |              |
| <b>AIF1</b><br>(CPD1)                                       | Haploid | Mitochondrial cell death effector that translocates to the nucleus in response to apoptotic stimuli, homolog of mammalian apoptosis-inducing factor (AIF), putative reductase.                                                                                                              | 4,5          |
| <b>CYC1</b>                                                 | Haploid | Cytochrome <i>c</i> isoform 1; electron carrier of the mitochondrial intermembrane space that transfers electrons from ubiquinone-cytochrome <i>c</i> oxidoreductase to cytochrome <i>c</i> oxidase during cellular respiration.                                                            | 6-14         |
| <b>CYC7</b>                                                 | Haploid | Cytochrome <i>c</i> isoform 2, expressed under hypoxic conditions; electron carrier of the mitochondrial intermembrane space that transfers electrons from ubiquinone-cytochrome <i>c</i> oxidoreductase to cytochrome <i>c</i> oxidase during cellular respiration.                        | 15-17        |
| <b>MCA1</b><br>(YCA1)                                       | Haploid | Putative cysteine protease similar to mammalian caspases, involved in regulation of apoptosis upon hydrogen peroxide (H <sub>2</sub> O <sub>2</sub> ) treatment.; contributes to clearance of insoluble protein aggregates during normal growth; may be involved in cell cycle progression. | 18-22        |
| <b>NDH1</b>                                                 | Haploid | NADH:ubiquinone oxidoreductase, transfers electrons from NADH to ubiquinone in the respiratory chain but does not pump protons, in contrast to the higher eukaryotic multisubunit respiratory complex I; phosphorylated; homolog of human AMID.                                             | 23-28        |
| <b>NMA111</b>                                               | Haploid | Serine protease and general molecular chaperone; involved in response to heat stress and promotion of apoptosis; may contribute to lipid homeostasis; sequence similarity to the mammalian Omi/HtrA2 family of serine proteases.                                                            | 29-32        |
| <b>NUC1</b>                                                 | Haploid | Major mitochondrial nuclease, has RNase and DNA endo- and exonucleolytic activities; has roles in mitochondrial recombination, apoptosis and maintenance of polyploidy.                                                                                                                     | 17,<br>33-36 |
| <i>Knockout strains - Proteases</i>                         |         |                                                                                                                                                                                                                                                                                             |              |
| <b>PEP4</b><br>( <i>yscA</i> ; PRA1;<br>PHO9)               | Haploid | Vacuolar aspartyl protease (proteinase A), required for the posttranslational precursor maturation of vacuolar proteinases; important for protein turnover after oxidative damage; synthesized as a zymogen, self-activates.                                                                | 17,<br>37-43 |
| <b>RIM13</b><br>(CPL1)                                      | Haploid | Calpain-like cysteine protease involved in proteolytic activation of Rim101p in response to alkaline pH; has similarity to <i>Aspergillus nidulans palB</i> .                                                                                                                               | 44           |

| <i>Knockout strains – Proteins related to the permeability transition pore complex (PTPC)</i> |         |                                                                                                                                                                                                                                                                                      |                       |
|-----------------------------------------------------------------------------------------------|---------|--------------------------------------------------------------------------------------------------------------------------------------------------------------------------------------------------------------------------------------------------------------------------------------|-----------------------|
| <b>AAC1</b>                                                                                   | Haploid | Mitochondrial inner membrane ADP/ATP translocator, exchanges cytosolic ADP for mitochondrially synthesized ATP; phosphorylated; Aac1p is a minor isoform while Pet9p is the major ADP/ATP translocator.                                                                              | 17,<br>45-47          |
| <b>AAC3</b><br>(ANC3)                                                                         | Haploid | Mitochondrial inner membrane ADP/ATP translocator, exchanges cytosolic ADP for mitochondrially synthesized ATP; expressed under anaerobic conditions; similar to Pet9p and Aac1p; has roles in maintenance of viability and in respiration.                                          | 17,<br>48-50          |
| <b>POR1</b><br>(OMP2)                                                                         | Haploid | Mitochondrial porin (voltage-dependent anion channel), outer membrane protein required for the maintenance of mitochondrial osmotic stability and mitochondrial membrane permeability; phosphorylated.                                                                               | 17,<br>51-57          |
| <b>POR2</b>                                                                                   | Haploid | Putative mitochondrial porin (voltage-dependent anion channel), related to Por1p but not required for mitochondrial membrane permeability or mitochondrial osmotic stability.                                                                                                        | 17,40,<br>55,58,59    |
| <i>Knockout strains – Autophagy-related proteins</i>                                          |         |                                                                                                                                                                                                                                                                                      |                       |
| <b>ATG5</b><br>(APG5)                                                                         | Haploid | Conserved protein involved in autophagy and the Cvt pathway; undergoes conjugation with Atg12p to form a complex involved in Atg8p lipidation; conjugated Atg12p also forms a complex with Atg16p that is essential for autophagosome formation.                                     | 60-65                 |
| <b>ATG10</b><br>(APG10)                                                                       | Haploid | Conserved E2-like conjugating enzyme that mediates formation of the Atg12p-Atg5p conjugate, which is a critical step in autophagy.                                                                                                                                                   | 66-68                 |
| <b>ATG12</b><br>(APG12)                                                                       | Haploid | Conserved ubiquitin-like modifier involved in autophagy and the Cvt pathway; conjugated to Atg5p to form a complex involved in Atg8p lipidation; Atg12p-Atg5p also forms a complex with Atg16p that is required for autophagosome formation.                                         | 65,<br>67-70          |
| <b>VPS30</b><br>(VPT30;<br>ATG6; APG6)                                                        | Haploid | Subunit of phosphatidylinositol (PtdIns) 3-kinase complexes I and II; Complex I is essential in autophagy and Complex II is required for vacuolar protein sorting; ortholog of the higher eukaryotic gene Beclin 1.                                                                  | 71-73                 |
| <b>VPS34</b><br>(PEP15, STT8,<br>VPL7, VPS7,<br>VPT29)                                        | Haploid | Phosphatidylinositol 3-kinase responsible for the synthesis of phosphatidylinositol 3-phosphate; forms membrane-associated signal transduction complex with Vps15p to regulate protein sorting; activated by the GTP-bound form of Gpa1p.                                            | 74-79                 |
| <i>Knockout strains – Proteins involved in mitochondrial fusion and fission</i>               |         |                                                                                                                                                                                                                                                                                      |                       |
| <b>DNM1</b>                                                                                   | Haploid | Dynamamin-related GTPase required for mitochondrial fission and the maintenance of mitochondrial morphology, assembles on the cytoplasmic face of mitochondrial tubules at sites at which division will occur; also participates in endocytosis and regulating peroxisome abundance. | 80-90                 |
| <b>FIS1</b><br>(MDV2)                                                                         | Haploid | Protein involved in mitochondrial membrane fission and peroxisome abundance; required for localization of Dnm1p and Mdv1p during mitochondrial division; mediates ethanol-induced apoptosis and ethanol-induced mitochondrial fragmentation.                                         | 55,82,85,<br>87,91-95 |
| <b>MDM10</b><br>(FUN37)                                                                       | Haploid | Subunit of both the ERMES complex that links the ER to mitochondria, and of the mitochondrial sorting and assembly machinery (SAM complex) that functions in import and assembly of outer membrane beta-barrel proteins.                                                             | 55,79,<br>96-99       |

|                                                                           |         |                                                                                                                                                                                                                                                        |                                 |
|---------------------------------------------------------------------------|---------|--------------------------------------------------------------------------------------------------------------------------------------------------------------------------------------------------------------------------------------------------------|---------------------------------|
| <b>MGM1</b><br>(MNA1)                                                     | Haploid | Mitochondrial GTPase, present in complex with Ugo1p and Fzo1p; required for mt morphology and genome maintenance; exists as long and short form with different distributions; homolog of human OPA1 involved in autosomal dominant optic atrophy.      | 96,<br>100-104                  |
| <b>MIR1</b>                                                               | Haploid | Mitochondrial phosphate carrier, imports inorganic phosphate into mitochondria; functionally redundant with Pic2p but more abundant than Pic2p under normal conditions; phosphorylated.                                                                | 17,40,<br>56,59,<br>105-107     |
| <b>OXA1</b>                                                               | Haploid | Mitochondrial inner membrane insertase, mediates the insertion of both mitochondrial- and nuclear-encoded proteins from the matrix into the inner membrane, interacts with mitochondrial ribosomes; conserved from bacteria to animals.                | 17,<br>108-116                  |
| <b>PCP1</b><br>(MDM37,<br>RBD1)                                           | Haploid | Mitochondrial serine protease required for the processing of various mitochondrial proteins and maintenance of mitochondrial DNA and morphology; belongs to the rhomboid-GlpG superfamily of intramembrane peptidases.                                 | 77,<br>117,118                  |
| <b>SAM37</b><br>(MAS37,<br>PET3027,<br>TOM37)                             | Haploid | Component of the Sorting and Assembly Machinery (SAM or TOB complex) of the mitochondrial outer membrane, which binds precursors of beta-barrel proteins and facilitates their outer membrane insertion; contributes to SAM complex stability.         | 17,55,<br>119,120               |
| <b>TIM18</b>                                                              | Haploid | Component of the mitochondrial TIM22 complex involved in insertion of polytopic proteins into the inner membrane; may mediate assembly or stability of the complex.                                                                                    | 17,121                          |
| <i>Knockout strains – Cell cycle regulators</i>                           |         |                                                                                                                                                                                                                                                        |                                 |
| <b>CHK1</b>                                                               | Haploid | Serine/threonine kinase and DNA damage checkpoint effector, mediates cell cycle arrest via phosphorylation of Pds1p; phosphorylated by checkpoint signal transducer Mec1p; homolog of <i>Saccharomyces pombe</i> and mammalian Chk1 checkpoint kinase. | 122-125                         |
| <b>MBP1</b>                                                               | Haploid | Transcription factor involved in regulation of cell cycle progression from G1 to S phase, forms a complex with Swi6p that binds to MluI cell cycle box regulatory element in promoters of DNA synthesis genes.                                         | 59,<br>126-130                  |
| <i>Knockout strains – Proteins involved in DNA replication and repair</i> |         |                                                                                                                                                                                                                                                        |                                 |
| <b>MCM2</b>                                                               | Diploid | Protein involved in DNA replication; component of the Mcm2-7 hexameric complex that binds chromatin as a part of the pre-replicative complex.                                                                                                          | 131-140                         |
| <b>MCM3</b>                                                               | Diploid | Protein involved in DNA replication; component of the Mcm2-7 hexameric complex that binds chromatin as a part of the pre-replicative complex.                                                                                                          | 59,131-135,<br>138-140          |
| <b>MCM5</b><br>(BOB1,<br>CDC46)                                           | Diploid | Component of the hexameric MCM complex, which is important for priming origins of DNA replication in G1 and becomes an active ATP-dependent helicase that promotes DNA melting and elongation when activated by Cdc7p-Dbf4p in S-phase.                | 138,<br>140-147                 |
| <b>MCM6</b>                                                               | Diploid | Protein involved in DNA replication; component of the Mcm2-7 hexameric complex that binds chromatin as a part of the pre-replicative complex.                                                                                                          | 131-135,<br>138,140,<br>148,149 |

|                                                                                |         |                                                                                                                                                                                                                                                  |                            |
|--------------------------------------------------------------------------------|---------|--------------------------------------------------------------------------------------------------------------------------------------------------------------------------------------------------------------------------------------------------|----------------------------|
| <b>MSH6</b><br>(PMS3)                                                          | Haploid | Protein required for mismatch repair in mitosis and meiosis, forms a complex with Msh2p to repair both single-base and insertion-deletion mispairs; potentially phosphorylated by Cdc28p.                                                        | 30,<br>150-158             |
| <b>PSF2</b><br>(CDC102)                                                        | Diploid | Subunit of the GINS complex (Sld5p, Psf1p, Psf2p, Psf3p), which is localized to DNA replication origins and implicated in assembly of the DNA replication machinery.                                                                             | 159-161                    |
| <i>Knockout strains – Proteins involved in chromatin structure</i>             |         |                                                                                                                                                                                                                                                  |                            |
| <b>NHP6A</b>                                                                   | Haploid | High-mobility group (HMG) protein that binds to and remodels nucleosomes; involved in recruiting FACT and other chromatin remodelling complexes to the chromosomes; functionally redundant with Nhp6Bp; homologous to mammalian HMGB1 and HMGB2. | 162-165                    |
| <b>NHP6B</b><br>(YBR090C-A)                                                    | Haploid | High-mobility group (HMG) protein that binds to and remodels nucleosomes; involved in recruiting FACT and other chromatin remodelling complexes to the chromosomes; functionally redundant with Nhp6Ap; homologous to mammalian HMGB1 and HMGB2. | 162-166                    |
| <i>Knockout strains – Kinases</i>                                              |         |                                                                                                                                                                                                                                                  |                            |
| <b>ADK1</b><br>(AKY1, KY2)                                                     | Haploid | Adenylate kinase, required for purine metabolism; localized to the cytoplasm and the mitochondria; lacks cleavable signal sequence.                                                                                                              | 17,<br>167-169             |
| <b>ADK2</b><br>(AKY3, PAK3)                                                    | Haploid | Mitochondrial adenylate kinase, catalyzes the reversible synthesis of GTP and AMP from GDP and ADP; may serve as a back-up for synthesizing GTP or ADP depending on metabolic conditions; 3' sequence of ADK2 varies with strain background.     | 17,<br>170,171             |
| <b>GLK1</b><br>(HOR3)                                                          | Haploid | Glucokinase, catalyzes the phosphorylation of glucose at C6 in the first irreversible step of glucose metabolism; one of three glucose phosphorylating enzymes; expression regulated by non-fermentable carbon sources.                          | 30,<br>172-175             |
| <b>HXK1</b>                                                                    | Haploid | Hexokinase isoenzyme 1, a cytosolic protein that catalyzes phosphorylation of glucose during glucose metabolism; expression is highest during growth on non-glucose carbon sources; glucose-induced repression involves the hexokinase Hxk2p.    | 30,173,<br>174,176,<br>177 |
| <b>HXK2</b><br>(HEX1, HKB,<br>SCI2)                                            | Haploid | Hexokinase isoenzyme 2 that catalyzes phosphorylation of glucose in the cytosol; predominant hexokinase during growth on glucose; functions in the nucleus to repress expression of HXK1 and GLK1 and to induce expression of its own gene.      | 56,<br>173,174,<br>176-185 |
| <b>TOR1</b><br>(DRR1)                                                          | Haploid | PIK-related protein kinase and rapamycin target; subunit of TORC1, a complex that controls growth in response to nutrients by regulating translation, transcription, ribosome biogenesis, nutrient transport and autophagy; involved in meiosis. | 186-211                    |
| <i>Knockout strains – Chaperons (members of the heat-shock protein family)</i> |         |                                                                                                                                                                                                                                                  |                            |
| <b>ECM10</b><br>(SSC3)                                                         | Haploid | Heat shock protein of the HSP70 family, localized in mitochondrial nucleoids, plays a role in protein translocation, interacts with Mge1p in an ATP-dependent manner; overexpression induces extensive mitochondrial DNA aggregations.           | 17,40,<br>212,213          |

|                                             |         |                                                                                                                                                                                                                                                   |                      |
|---------------------------------------------|---------|---------------------------------------------------------------------------------------------------------------------------------------------------------------------------------------------------------------------------------------------------|----------------------|
| <b>SSQ1</b><br>(SSC2, SSH1)                 | Haploid | Mitochondrial HSP70-type molecular chaperone, required for assembly of iron/sulfur clusters into proteins at a step after cluster synthesis, and for maturation of Yfh1p, which is a homolog of human frataxin implicated in Friedreich's ataxia. | 17,<br>214-217       |
| <i>Knockout strains – Others</i>            |         |                                                                                                                                                                                                                                                   |                      |
| <b>CPR3</b><br>(CYP3)                       | Haploid | Mitochondrial peptidyl-prolyl cis-trans isomerase (cyclophilin), catalyzes the cis-trans isomerization of peptide bonds N-terminal to proline residues; involved in protein refolding after import into mitochondria.                             | 17,40,<br>218        |
| <b>CYB5</b>                                 | Haploid | Cytochrome b5, involved in the sterol and lipid biosynthesis pathways; acts as an electron donor to support sterol C5-6 desaturation.                                                                                                             | 219,220              |
| <b>GTT2</b>                                 | Haploid | Glutathione S-transferase capable of homodimerization; functional overlap with Gtt2p, Grx1p, and Grx2p.                                                                                                                                           | 17,40,<br>221-223    |
| <b>NNT1</b>                                 | Haploid | Putative nicotinamide N-methyltransferase, has a role in rDNA silencing and in lifespan determination.                                                                                                                                            | 224,225              |
| <b>SOD2</b>                                 | Haploid | Mitochondrial manganese superoxide dismutase, protects cells against oxygen toxicity; phosphorylated.                                                                                                                                             | 17,40,59,<br>226-233 |
| <b>TDH1</b><br>(GLD3)                       | Haploid | Glyceraldehyde-3-phosphate dehydrogenase, isozyme 1, involved in glycolysis and gluconeogenesis; tetramer that catalyzes the reaction of glyceraldehyde-3-phosphate to 1,3 bis-phosphoglycerate; detected in the cytoplasm and cell-wall.         | 17,<br>234-236       |
| <b>TDH2</b><br>(GLD2)                       | Haploid | Glyceraldehyde-3-phosphate dehydrogenase, isozyme 2, involved in glycolysis and gluconeogenesis; tetramer that catalyzes the reaction of glyceraldehyde-3-phosphate to 1,3 bis-phosphoglycerate; detected in the cytoplasm and cell-wall.         | 56,59,<br>234-236    |
| <b>TDH3</b><br>(GLD1, SP35,<br>HSP36, SSS2) | Haploid | Glyceraldehyde-3-phosphate dehydrogenase, isozyme 3, involved in glycolysis and gluconeogenesis; tetramer that catalyzes the reaction of glyceraldehyde-3-phosphate to 1,3 bis-phosphoglycerate; detected in the cytoplasm and cell-wall.         | 17,56,59,<br>234-236 |
| <b>TRX3</b>                                 | Haploid | Mitochondrial thioredoxin, highly conserved oxidoreductase required to maintain the redox homeostasis of the cell, forms the mitochondrial thioredoxin system with Trr2p, redox state is maintained by both Trr2p and Glr1p.                      | 17,40,<br>237,238    |
| <b>YNL305C</b><br>(YBH3)                    | Haploid | Hypothetical protein; green fluorescent protein (GFP)-fusion protein localizes to the vacuole; YNL305C is not an essential gene.                                                                                                                  | 30,239               |

*S. cerevisiae* mutant strains were obtained from Euroscarf (Frankfurt, Germany). When gene deletion resulted in the inviability of haploid cells (BY4741 strain), the analysis was performed on the corresponding heterozygous knockouts (in the diploid strain BY4743). Official gene symbols and notes were found in the NCBI – Entrez Gene Database (<http://www.ncbi.nlm.nih.gov/sites/entrez>).



## Supplementary References

1. Brachmann CB, Davies A, Cost GJ, Caputo E, Li J, Hieter P, et al. Designer deletion strains derived from *Saccharomyces cerevisiae* S288C: a useful set of strains and plasmids for PCR-mediated gene disruption and other applications. *Yeast* 1998; 14:115-32.
2. Winzeler EA, Shoemaker DD, Astromoff A, Liang H, Anderson K, Andre B, et al. Functional characterization of the *S. cerevisiae* genome by gene deletion and parallel analysis. *Science* 1999; 285:901-6.
3. Fox TD, Folley LS, Mulero JJ, McMullin TW, Thorsness PE, Hedin LO, et al. Analysis and manipulation of yeast mitochondrial genes. *Methods Enzymol* 1991; 194:149-65.
4. Ververidis P, Davrazou F, Diallinas G, Georgakopoulos D, Kanellis AK, Panopoulos N. A novel putative reductase (Cpd1p) and the multidrug exporter Snq2p are involved in resistance to cercosporin and other singlet oxygen-generating photosensitizers in *Saccharomyces cerevisiae*. *Curr Genet* 2001; 39:127-36.
5. Wissing S, Ludovico P, Herker E, Buttner S, Engelhardt SM, Decker T, et al. An AIF orthologue regulates apoptosis in yeast. *J Cell Biol* 2004; 166:969-74.
6. Mulligan-Pullyblank P, Spitzer JS, Gilden BM, Fetrow JS. Loop replacement and random mutagenesis of omega-loop D, residues 70-84, in iso-1-cytochrome c. *J Biol Chem* 1996; 271:8633-45.
7. Martin H, Eckerskorn C, Gartner F, Rassow J, Lottspeich F, Pfanner N. The yeast mitochondrial intermembrane space: purification and analysis of two distinct fractions. *Anal Biochem* 1998; 265:123-8.
8. Redzic JS, Bowler BE. Role of hydrogen bond networks and dynamics in positive and negative cooperative stabilization of a protein. *Biochemistry* 2005; 44:2900-8.
9. Covian R, Trumpower BL. Rapid electron transfer between monomers when the cytochrome bc1 complex dimer is reduced through center N. *J Biol Chem* 2005; 280:22732-40.
10. Tzul FO, Kurchan E, Bowler BE. Sequence composition effects on denatured state loop formation in iso-1-cytochrome c variants: polyalanine versus polyglycine inserts. *J Mol Biol* 2007; 371:577-84.

11. Kinoshita M, Kamagata K, Maeda A, Goto Y, Komatsuzaki T, Takahashi S. Development of a technique for the investigation of folding dynamics of single proteins for extended time periods. *Proc Natl Acad Sci U S A* 2007; 104:10453-8.
12. Black KM, Wallace CJ. Probing the role of the conserved beta-II turn Pro-76/Gly-77 of mitochondrial cytochrome c. *Biochem Cell Biol* 2007; 85:366-74.
13. Battistuzzi G, Borsari M, De Rienzo F, Di Rocco G, Ranieri A, Sola M. Free energy of transition for the individual alkaline conformers of yeast iso-1-cytochrome c. *Biochemistry* 2007; 46:1694-702.
14. Agueci F, Polticelli F, Sinibaldi F, Piro MC, Santucci R, Fiorucci L. Probing the effect of mutations on cytochrome C stability. *Protein Pept Lett* 2007; 14:335-9.
15. Montgomery DL, Leung DW, Smith M, Shalit P, Faye G, Hall BD. Isolation and sequence of the gene for iso-2-cytochrome c in *Saccharomyces cerevisiae*. *Proc Natl Acad Sci U S A* 1980; 77:541-5.
16. Wang X, Dumont ME, Sherman F. Sequence requirements for mitochondrial import of yeast cytochrome c. *J Biol Chem* 1996; 271:6594-604.
17. Reinders J, Zahedi RP, Pfanner N, Meisinger C, Sickmann A. Toward the complete yeast mitochondrial proteome: multidimensional separation techniques for mitochondrial proteomics. *J Proteome Res* 2006; 5:1543-54.
18. Madeo F, Herker E, Maldener C, Wissing S, Lachelt S, Herlan M, et al. A caspase-related protease regulates apoptosis in yeast. *Mol Cell* 2002; 9:911-7.
19. Szallies A, Kubata BK, Duszenko M. A metacaspase of *Trypanosoma brucei* causes loss of respiration competence and clonal death in the yeast *Saccharomyces cerevisiae*. *FEBS Lett* 2002; 517:144-50.
20. Bettiga M, Calzari L, Orlandi I, Alberghina L, Vai M. Involvement of the yeast metacaspase Yca1 in ubp10Delta-programmed cell death. *FEMS Yeast Res* 2004; 5:141-7.
21. Guaragnella N, Pereira C, Sousa MJ, Antonacci L, Passarella S, Corte-Real M, et al. YCA1 participates in the acetic acid induced yeast programmed cell death also in a manner unrelated to its caspase-like activity. *FEBS Lett* 2006; 580:6880-4.

22. Khan MA, Chock PB, Stadtman ER. Knockout of caspase-like gene, YCA1, abrogates apoptosis and elevates oxidized proteins in *Saccharomyces cerevisiae*. *Proc Natl Acad Sci U S A* 2005; 102:17326-31.
23. de Vries S, Grivell LA. Purification and characterization of a rotenone-insensitive NADH:Q6 oxidoreductase from mitochondria of *Saccharomyces cerevisiae*. *Eur J Biochem* 1988; 176:377-84.
24. Marres CA, de Vries S, Grivell LA. Isolation and inactivation of the nuclear gene encoding the rotenone-insensitive internal NADH: ubiquinone oxidoreductase of mitochondria from *Saccharomyces cerevisiae*. *Eur J Biochem* 1991; 195:857-62.
25. Li W, Sun L, Liang Q, Wang J, Mo W, Zhou B. Yeast AMID homologue Ndi1p displays respiration-restricted apoptotic activity and is involved in chronological aging. *Mol Biol Cell* 2006; 17:1802-11.
26. Park JS, Li YF, Bai Y. Yeast NDI1 improves oxidative phosphorylation capacity and increases protection against oxidative stress and cell death in cells carrying a Leber's hereditary optic neuropathy mutation. *Biochim Biophys Acta* 2007; 1772:533-42.
27. Seo BB, Marella M, Yagi T, Matsuno-Yagi A. The single subunit NADH dehydrogenase reduces generation of reactive oxygen species from complex I. *FEBS Lett* 2006; 580:6105-8.
28. Yamashita T, Nakamaru-Ogiso E, Miyoshi H, Matsuno-Yagi A, Yagi T. Roles of bound quinone in the single subunit NADH-quinone oxidoreductase (Ndi1) from *Saccharomyces cerevisiae*. *J Biol Chem* 2007; 282:6012-20.
29. Jones JM, Datta P, Srinivasula SM, Ji W, Gupta S, Zhang Z, et al. Loss of Omi mitochondrial protease activity causes the neuromuscular disorder of *mnd2* mutant mice. *Nature* 2003; 425:721-7.
30. Huh WK, Falvo JV, Gerke LC, Carroll AS, Howson RW, Weissman JS, et al. Global analysis of protein localization in budding yeast. *Nature* 2003; 425:686-91.
31. Fahrenkrog B, Sauder U, Aebi U. The *S. cerevisiae* HtrA-like protein Nma111p is a nuclear serine protease that mediates yeast apoptosis. *J Cell Sci* 2004; 117:115-26.

32. Tong F, Black PN, Bivins L, Quackenbush S, Ctrnacta V, DiRusso CC. Direct interaction of *Saccharomyces cerevisiae* Faa1p with the Omi/HtrA protease orthologue Ynm3p alters lipid homeostasis. *Mol Genet Genomics* 2006; 275:330-43.
33. Dake E, Hofmann TJ, McIntire S, Hudson A, Zassenhaus HP. Purification and properties of the major nuclease from mitochondria of *Saccharomyces cerevisiae*. *J Biol Chem* 1988; 263:7691-702.
34. Zassenhaus HP, Denniger G. Analysis of the role of the NUC1 endo/exonuclease in yeast mitochondrial DNA recombination. *Curr Genet* 1994; 25:142-9.
35. Wade CH, Umbarger MA, McAlear MA. The budding yeast rRNA and ribosome biosynthesis (RRB) regulon contains over 200 genes. *Yeast* 2006; 23:293-306.
36. Buttner S, Carmona-Gutierrez D, Vitale I, Castedo M, Ruli D, Eisenberg T, et al. Depletion of endonuclease G selectively kills polyploid cells. *Cell Cycle* 2007; 6:1072-6.
37. Teichert U, Mechler B, Muller H, Wolf DH. Lysosomal (vacuolar) proteinases of yeast are essential catalysts for protein degradation, differentiation, and cell survival. *J Biol Chem* 1989; 264:16037-45.
38. Bryant NJ, Stevens TH. Vacuole biogenesis in *Saccharomyces cerevisiae*: protein transport pathways to the yeast vacuole. *Microbiol Mol Biol Rev* 1998; 62:230-47.
39. Roberts P, Moshitch-Moshkovitz S, Kvam E, O'Toole E, Winey M, Goldfarb DS. Piecemeal microautophagy of nucleus in *Saccharomyces cerevisiae*. *Mol Biol Cell* 2003; 14:129-41.
40. Sickmann A, Reinders J, Wagner Y, Joppich C, Zahedi R, Meyer HE, et al. The proteome of *Saccharomyces cerevisiae* mitochondria. *Proc Natl Acad Sci U S A* 2003; 100:13207-12.
41. Swaminathan S, Sunnerhagen P. Degradation of *Saccharomyces cerevisiae* Rck2 upon exposure of cells to high levels of zinc is dependent on Pep4. *Mol Genet Genomics* 2005; 273:433-9.
42. Mason DA, Shulga N, Undavai S, Ferrando-May E, Rexach MF, Goldfarb DS. Increased nuclear envelope permeability and Pep4p-dependent degradation of nucleoporins during hydrogen peroxide-induced cell death. *FEMS Yeast Res* 2005; 5:1237-51.

43. Marques M, Mojzita D, Amorim MA, Almeida T, Hohmann S, Moradas-Ferreira P, et al. The Pep4p vacuolar proteinase contributes to the turnover of oxidized proteins but PEP4 overexpression is not sufficient to increase chronological lifespan in *Saccharomyces cerevisiae*. *Microbiology* 2006; 152:3595-605.
44. Futai E, Maeda T, Sorimachi H, Kitamoto K, Ishiura S, Suzuki K. The protease activity of a calpain-like cysteine protease in *Saccharomyces cerevisiae* is required for alkaline adaptation and sporulation. *Mol Gen Genet* 1999; 260:559-68.
45. Gawaz M, Douglas MG, Klingenberg M. Structure-function studies of adenine nucleotide transport in mitochondria. II. Biochemical analysis of distinct AAC1 and AAC2 proteins in yeast. *J Biol Chem* 1990; 265:14202-8.
46. Lawson JE, Gawaz M, Klingenberg M, Douglas MG. Structure-function studies of adenine nucleotide transport in mitochondria. I. Construction and genetic analysis of yeast mutants encoding the ADP/ATP carrier protein of mitochondria. *J Biol Chem* 1990; 265:14195-201.
47. Vergnolle MA, Sawney H, Junne T, Dolfini L, Tokatlidis K. A cryptic matrix targeting signal of the yeast ADP/ATP carrier normally inserted by the TIM22 complex is recognized by the TIM23 machinery. *Biochem J* 2005; 385:173-80.
48. Kolarov J, Kolarova N, Nelson N. A third ADP/ATP translocator gene in yeast. *J Biol Chem* 1990; 265:12711-6.
49. Drgon T, Sabova L, Nelson N, Kolarov J. ADP/ATP translocator is essential only for anaerobic growth of yeast *Saccharomyces cerevisiae*. *FEBS Lett* 1991; 289:159-62.
50. Drgon T, Sabova L, Gavurnikova G, Kolarov J. Yeast ADP/ATP carrier (AAC) proteins exhibit similar enzymatic properties but their deletion produces different phenotypes. *FEBS Lett* 1992; 304:277-80.
51. Dihanich M, Suda K, Schatz G. A yeast mutant lacking mitochondrial porin is respiratory-deficient, but can recover respiration with simultaneous accumulation of an 86-kd extramitochondrial protein. *Embo J* 1987; 6:723-8.
52. Smith MD, Petrak M, Boucher PD, Barton KN, Carter L, Reddy G, et al. Lysine residues at positions 234 and 236 in yeast porin are involved in its assembly into the mitochondrial outer membrane. *J Biol Chem* 1995; 270:28331-6.

53. Koppel DA, Kinnally KW, Masters P, Forte M, Blachly-Dyson E, Mannella CA. Bacterial expression and characterization of the mitochondrial outer membrane channel. Effects of n-terminal modifications. *J Biol Chem* 1998; 273:13794-800.
54. Sanchez NS, Pearce DA, Cardillo TS, Uribe S, Sherman F. Requirements of Cyc2p and the porin, Por1p, for ionic stability and mitochondrial integrity in *Saccharomyces cerevisiae*. *Arch Biochem Biophys* 2001; 392:326-32.
55. Zahedi RP, Sickmann A, Boehm AM, Winkler C, Zufall N, Schonfisch B, et al. Proteomic analysis of the yeast mitochondrial outer membrane reveals accumulation of a subclass of preproteins. *Mol Biol Cell* 2006; 17:1436-50.
56. Brandina I, Graham J, Lemaitre-Guillier C, Entelis N, Krasheninnikov I, Sweetlove L, et al. Enolase takes part in a macromolecular complex associated to mitochondria in yeast. *Biochim Biophys Acta* 2006; 1757:1217-28.
57. Burri L, Vascotto K, Gentle IE, Chan NC, Beilharz T, Stapleton DI, et al. Integral membrane proteins in the mitochondrial outer membrane of *Saccharomyces cerevisiae*. *Febs J* 2006; 273:1507-15.
58. Blachly-Dyson E, Song J, Wolfgang WJ, Colombini M, Forte M. Multicopy suppressors of phenotypes resulting from the absence of yeast VDAC encode a VDAC-like protein. *Mol Cell Biol* 1997; 17:5727-38.
59. Kumar A, Agarwal S, Heyman JA, Matson S, Heidtman M, Piccirillo S, et al. Subcellular localization of the yeast proteome. *Genes Dev* 2002; 16:707-19.
60. Kametaka S, Matsuura A, Wada Y, Ohsumi Y. Structural and functional analyses of APG5, a gene involved in autophagy in yeast. *Gene* 1996; 178:139-43.
61. George MD, Baba M, Scott SV, Mizushima N, Garrison BS, Ohsumi Y, et al. Apg5p functions in the sequestration step in the cytoplasm-to-vacuole targeting and macroautophagy pathways. *Mol Biol Cell* 2000; 11:969-82.
62. Suzuki K, Kirisako T, Kamada Y, Mizushima N, Noda T, Ohsumi Y. The pre-autophagosomal structure organized by concerted functions of APG genes is essential for autophagosome formation. *Embo J* 2001; 20:5971-81.

63. Kuma A, Mizushima N, Ishihara N, Ohsumi Y. Formation of the approximately 350-kDa Apg12-Apg5-Apg16 multimeric complex, mediated by Apg16 oligomerization, is essential for autophagy in yeast. *J Biol Chem* 2002; 277:18619-25.
64. Stromhaug PE, Reggiori F, Guan J, Wang CW, Klionsky DJ. Atg21 is a phosphoinositide binding protein required for efficient lipidation and localization of Atg8 during uptake of aminopeptidase I by selective autophagy. *Mol Biol Cell* 2004; 15:3553-66.
65. Hanada T, Ohsumi Y. Structure-function relationship of Atg12, a ubiquitin-like modifier essential for autophagy. *Autophagy* 2005; 1:110-8.
66. Tsukada M, Ohsumi Y. Isolation and characterization of autophagy-defective mutants of *Saccharomyces cerevisiae*. *FEBS Lett* 1993; 333:169-74.
67. Mizushima N, Noda T, Yoshimori T, Tanaka Y, Ishii T, George MD, et al. A protein conjugation system essential for autophagy. *Nature* 1998; 395:395-8.
68. Shintani T, Mizushima N, Ogawa Y, Matsuura A, Noda T, Ohsumi Y. Apg10p, a novel protein-conjugating enzyme essential for autophagy in yeast. *Embo J* 1999; 18:5234-41.
69. Kim J, Dalton VM, Eggerton KP, Scott SV, Klionsky DJ. Apg7p/Cvt2p is required for the cytoplasm-to-vacuole targeting, macroautophagy, and peroxisome degradation pathways. *Mol Biol Cell* 1999; 10:1337-51.
70. Tanida I, Mizushima N, Kiyooka M, Ohsumi M, Ueno T, Ohsumi Y, et al. Apg7p/Cvt2p: A novel protein-activating enzyme essential for autophagy. *Mol Biol Cell* 1999; 10:1367-79.
71. Seaman MN, Marcusson EG, Cereghino JL, Emr SD. Endosome to Golgi retrieval of the vacuolar protein sorting receptor, Vps10p, requires the function of the VPS29, VPS30, and VPS35 gene products. *J Cell Biol* 1997; 137:79-92.
72. Kametaka S, Okano T, Ohsumi M, Ohsumi Y. Apg14p and Apg6/Vps30p form a protein complex essential for autophagy in the yeast, *Saccharomyces cerevisiae*. *J Biol Chem* 1998; 273:22284-91.
73. Kruse KB, Brodsky JL, McCracken AA. Characterization of an ERAD gene as VPS30/ATG6 reveals two alternative and functionally distinct protein quality control pathways: one for soluble Z variant of human alpha-1 proteinase inhibitor (A1PiZ) and another for aggregates of A1PiZ. *Mol Biol Cell* 2006; 17:203-12.

74. Herman PK, Emr SD. Characterization of VPS34, a gene required for vacuolar protein sorting and vacuole segregation in *Saccharomyces cerevisiae*. *Mol Cell Biol* 1990; 10:6742-54.
75. Stack JH, Emr SD. Vps34p required for yeast vacuolar protein sorting is a multiple specificity kinase that exhibits both protein kinase and phosphatidylinositol-specific PI 3-kinase activities. *J Biol Chem* 1994; 269:31552-62.
76. Stack JH, DeWald DB, Takegawa K, Emr SD. Vesicle-mediated protein transport: regulatory interactions between the Vps15 protein kinase and the Vps34 PtdIns 3-kinase essential for protein sorting to the vacuole in yeast. *J Cell Biol* 1995; 129:321-34.
77. Askree SH, Yehuda T, Smolikov S, Gurevich R, Hawk J, Coker C, et al. A genome-wide screen for *Saccharomyces cerevisiae* deletion mutants that affect telomere length. *Proc Natl Acad Sci U S A* 2004; 101:8658-63.
78. Slessareva JE, Routt SM, Temple B, Bankaitis VA, Dohlman HG. Activation of the phosphatidylinositol 3-kinase Vps34 by a G protein alpha subunit at the endosome. *Cell* 2006; 126:191-203.
79. Gathbonton T, Imbesi M, Nelson M, Akey JM, Ruderfer DM, Kruglyak L, et al. Telomere length as a quantitative trait: genome-wide survey and genetic mapping of telomere length-control genes in yeast. *PLoS Genet* 2006; 2:e35.
80. Otsuga D, Keegan BR, Brisch E, Thatcher JW, Hermann GJ, Bleazard W, et al. The dynamin-related GTPase, Dnm1p, controls mitochondrial morphology in yeast. *J Cell Biol* 1998; 143:333-49.
81. Bleazard W, McCaffery JM, King EJ, Bale S, Mozdy A, Tieu Q, et al. The dynamin-related GTPase Dnm1 regulates mitochondrial fission in yeast. *Nat Cell Biol* 1999; 1:298-304.
82. Tieu Q, Nunnari J. Mdv1p is a WD repeat protein that interacts with the dynamin-related GTPase, Dnm1p, to trigger mitochondrial division. *J Cell Biol* 2000; 151:353-66.
83. Griffin EE, Graumann J, Chan DC. The WD40 protein Caf4p is a component of the mitochondrial fission machinery and recruits Dnm1p to mitochondria. *J Cell Biol* 2005; 170:237-48.
84. Ingerman E, Perkins EM, Marino M, Mears JA, McCaffery JM, Hinshaw JE, et al. Dnm1 forms spirals that are structurally tailored to fit mitochondria. *J Cell Biol* 2005; 170:1021-7.



85. Schauss AC, Bewersdorf J, Jakobs S. Fis1p and Caf4p, but not Mdv1p, determine the polar localization of Dnm1p clusters on the mitochondrial surface. *J Cell Sci* 2006; 119:3098-106.
86. Naylor K, Ingerman E, Okreglak V, Marino M, Hinshaw JE, Nunnari J. Mdv1 interacts with assembled dnm1 to promote mitochondrial division. *J Biol Chem* 2006; 281:2177-83.
87. Bhar D, Karren MA, Babst M, Shaw JM. Dimeric Dnm1-G385D interacts with Mdv1 on mitochondria and can be stimulated to assemble into fission complexes containing Mdv1 and Fis1. *J Biol Chem* 2006; 281:17312-20.
88. Kuravi K, Nagotu S, Krikken AM, Sjollem K, Deckers M, Erdmann R, et al. Dynamamin-related proteins Vps1p and Dnm1p control peroxisome abundance in *Saccharomyces cerevisiae*. *J Cell Sci* 2006; 119:3994-4001.
89. Scheckhuber CQ, Erjavec N, Tinazli A, Hamann A, Nystrom T, Osiewacz HD. Reducing mitochondrial fission results in increased life span and fitness of two fungal ageing models. *Nat Cell Biol* 2007; 9:99-105.
90. Cervený KL, Studer SL, Jensen RE, Sesaki H. Yeast mitochondrial division and distribution require the cortical num1 protein. *Dev Cell* 2007; 12:363-75.
91. Mozdy AD, McCaffery JM, Shaw JM. Dnm1p GTPase-mediated mitochondrial fission is a multi-step process requiring the novel integral membrane component Fis1p. *J Cell Biol* 2000; 151:367-80.
92. Kitagaki H, Araki Y, Funato K, Shimoi H. Ethanol-induced death in yeast exhibits features of apoptosis mediated by mitochondrial fission pathway. *FEBS Lett* 2007; 581:2935-42.
93. Dilda PJ, Don AS, Tanabe KM, Higgins VJ, Allen JD, Dawes IW, et al. Mechanism of selectivity of an angiogenesis inhibitor from screening a genome-wide set of *Saccharomyces cerevisiae* deletion strains. *J Natl Cancer Inst* 2005; 97:1539-47.
94. Suzuki M, Neutzner A, Tjandra N, Youle RJ. Novel structure of the N terminus in yeast Fis1 correlates with a specialized function in mitochondrial fission. *J Biol Chem* 2005; 280:21444-52.
95. Tjandra N, Suzuki M, Chang SL. Refinement of protein structure against non-redundant carbonyl <sup>13</sup>C NMR relaxation. *J Biomol NMR* 2007; 38:243-53.

96. Hermann GJ, Shaw JM. Mitochondrial dynamics in yeast. *Annu Rev Cell Dev Biol* 1998; 14:265-303.
97. Boldogh IR, Nowakowski DW, Yang HC, Chung H, Karmon S, Royes P, et al. A protein complex containing Mdm10p, Mdm12p, and Mmm1p links mitochondrial membranes and DNA to the cytoskeleton-based segregation machinery. *Mol Biol Cell* 2003; 14:4618-27.
98. Meisinger C, Rissler M, Chacinska A, Szklarz LK, Milenkovic D, Kozjak V, et al. The mitochondrial morphology protein Mdm10 functions in assembly of the preprotein translocase of the outer membrane. *Dev Cell* 2004; 7:61-71.
99. Meisinger C, Wiedemann N, Rissler M, Strub A, Milenkovic D, Schonfisch B, et al. Mitochondrial protein sorting: differentiation of beta-barrel assembly by Tom7-mediated segregation of Mdm10. *J Biol Chem* 2006; 281:22819-26.
100. Jones BA, Fangman WL. Mitochondrial DNA maintenance in yeast requires a protein containing a region related to the GTP-binding domain of dynamin. *Genes Dev* 1992; 6:380-9.
101. Wong ED, Wagner JA, Scott SV, Okreglak V, Holewinski TJ, Cassidy-Stone A, et al. The intramitochondrial dynamin-related GTPase, Mgm1p, is a component of a protein complex that mediates mitochondrial fusion. *J Cell Biol* 2003; 160:303-11.
102. Sesaki H, Southard SM, Yaffe MP, Jensen RE. Mgm1p, a dynamin-related GTPase, is essential for fusion of the mitochondrial outer membrane. *Mol Biol Cell* 2003; 14:2342-56.
103. Amutha B, Gordon DM, Gu Y, Pain D. A novel role of Mgm1p, a dynamin-related GTPase, in ATP synthase assembly and cristae formation/maintenance. *Biochem J* 2004; 381:19-23.
104. Meeusen S, DeVay R, Block J, Cassidy-Stone A, Wayson S, McCaffery JM, et al. Mitochondrial inner-membrane fusion and crista maintenance requires the dynamin-related GTPase Mgm1. *Cell* 2006; 127:383-95.
105. Murakami H, Blobel G, Pain D. Isolation and characterization of the gene for a yeast mitochondrial import receptor. *Nature* 1990; 347:488-91.
106. Dietmeier K, Zara V, Palmisano A, Palmieri F, Voos W, Schlossmann J, et al. Targeting and translocation of the phosphate carrier/p32 to the inner membrane of yeast mitochondria. *J Biol Chem* 1993; 268:25958-64.

107. Schroers A, Kramer R, Wohlrab H. The reversible antiport-uniport conversion of the phosphate carrier from yeast mitochondria depends on the presence of a single cysteine. *J Biol Chem* 1997; 272:10558-64.
108. Herrmann JM, Neupert W, Stuart RA. Insertion into the mitochondrial inner membrane of a polytopic protein, the nuclear-encoded Oxa1p. *Embo J* 1997; 16:2217-26.
109. Hell K, Herrmann J, Pratje E, Neupert W, Stuart RA. Oxa1p mediates the export of the N- and C-termini of pCoxII from the mitochondrial matrix to the intermembrane space. *FEBS Lett* 1997; 418:367-70.
110. He S, Fox TD. Membrane translocation of mitochondrially coded Cox2p: distinct requirements for export of N and C termini and dependence on the conserved protein Oxa1p. *Mol Biol Cell* 1997; 8:1449-60.
111. Hell K, Herrmann JM, Pratje E, Neupert W, Stuart RA. Oxa1p, an essential component of the N-tail protein export machinery in mitochondria. *Proc Natl Acad Sci U S A* 1998; 95:2250-5.
112. Lemaire C, Guibet-Grandmougin F, Angles D, Dujardin G, Bonnefoy N. A yeast mitochondrial membrane methyltransferase-like protein can compensate for oxa1 mutations. *J Biol Chem* 2004; 279:47464-72.
113. Reif S, Randelj O, Domanska G, Dian EA, Krimmer T, Motz C, et al. Conserved mechanism of Oxa1 insertion into the mitochondrial inner membrane. *J Mol Biol* 2005; 354:520-8.
114. Hlavacek O, Bourens M, Salone V, Lachacinski N, Lemaire C, Dujardin G. The transcriptional activator HAP4 is a high copy suppressor of an oxa1 yeast mutation. *Gene* 2005; 354:53-7.
115. Ott M, Prestele M, Bauerschmitt H, Funes S, Bonnefoy N, Herrmann JM. Mba1, a membrane-associated ribosome receptor in mitochondria. *Embo J* 2006; 25:1603-10.
116. Jia L, Dienhart MK, Stuart RA. Oxa1 directly interacts with Atp9 and mediates its assembly into the mitochondrial F1Fo-ATP synthase complex. *Mol Biol Cell* 2007; 18:1897-908.
117. Esser K, Tursun B, Ingenhoven M, Michaelis G, Pratje E. A novel two-step mechanism for removal of a mitochondrial signal sequence involves the mAAA complex and the putative rhomboid protease Pcp1. *J Mol Biol* 2002; 323:835-43.

118. Dimmer KS, Fritz S, Fuchs F, Messerschmitt M, Weinbach N, Neupert W, et al. Genetic basis of mitochondrial function and morphology in *Saccharomyces cerevisiae*. *Mol Biol Cell* 2002; 13:847-53.
119. Wiedemann N, Kozjak V, Chacinska A, Schonfisch B, Rospert S, Ryan MT, et al. Machinery for protein sorting and assembly in the mitochondrial outer membrane. *Nature* 2003; 424:565-71.
120. Habib SJ, Waizenegger T, Lech M, Neupert W, Rapaport D. Assembly of the TOB complex of mitochondria. *J Biol Chem* 2005; 280:6434-40.
121. Kerscher O, Sepuri NB, Jensen RE. Tim18p is a new component of the Tim54p-Tim22p translocon in the mitochondrial inner membrane. *Mol Biol Cell* 2000; 11:103-16.
122. Liu Y, Vidanes G, Lin YC, Mori S, Siede W. Characterization of a *Saccharomyces cerevisiae* homologue of *Schizosaccharomyces pombe* Chk1 involved in DNA-damage-induced M-phase arrest. *Mol Gen Genet* 2000; 262:1132-46.
123. Wang H, Liu D, Wang Y, Qin J, Elledge SJ. Pds1 phosphorylation in response to DNA damage is essential for its DNA damage checkpoint function. *Genes Dev* 2001; 15:1361-72.
124. Schollaert KL, Poisson JM, Searle JS, Schwanekamp JA, Tomlinson CR, Sanchez Y. A role for *Saccharomyces cerevisiae* Chk1p in the response to replication blocks. *Mol Biol Cell* 2004; 15:4051-63.
125. Karumbati AS, Wilson TE. Abrogation of the Chk1-Pds1 checkpoint leads to tolerance of persistent single-strand breaks in *Saccharomyces cerevisiae*. *Genetics* 2005; 169:1833-44.
126. Koch C, Moll T, Neuberg M, Ahorn H, Nasmyth K. A role for the transcription factors Mbp1 and Swi4 in progression from G1 to S phase. *Science* 1993; 261:1551-7.
127. Nair M, McIntosh PB, Frenkiel TA, Kelly G, Taylor IA, Smerdon SJ, et al. NMR structure of the DNA-binding domain of the cell cycle protein Mbp1 from *Saccharomyces cerevisiae*. *Biochemistry* 2003; 42:1266-73.
128. Bean JM, Siggia ED, Cross FR. High functional overlap between MluI cell-cycle box binding factor and Swi4/6 cell-cycle box binding factor in the G1/S transcriptional program in *Saccharomyces cerevisiae*. *Genetics* 2005; 171:49-61.

129. de Bruin RA, Kalashnikova TI, Chahwan C, McDonald WH, Wohlschlegel J, Yates J, 3rd, et al. Constraining G1-specific transcription to late G1 phase: the MBF-associated corepressor Nrm1 acts via negative feedback. *Mol Cell* 2006; 23:483-96.
130. Mai B, Breeden LL. Identification of target genes of a yeast transcriptional repressor. *Methods Mol Biol* 2006; 317:267-77.
131. Aparicio OM, Weinstein DM, Bell SP. Components and dynamics of DNA replication complexes in *S. cerevisiae*: redistribution of MCM proteins and Cdc45p during S phase. *Cell* 1997; 91:59-69.
132. Zou L, Stillman B. Formation of a preinitiation complex by S-phase cyclin CDK-dependent loading of Cdc45p onto chromatin. *Science* 1998; 280:593-6.
133. Leatherwood J. Emerging mechanisms of eukaryotic DNA replication initiation. *Curr Opin Cell Biol* 1998; 10:742-8.
134. Nguyen VQ, Co C, Irie K, Li JJ. Clb/Cdc28 kinases promote nuclear export of the replication initiator proteins Mcm2-7. *Curr Biol* 2000; 10:195-205.
135. Labib K, Tercero JA, Diffley JF. Uninterrupted MCM2-7 function required for DNA replication fork progression. *Science* 2000; 288:1643-7.
136. Homesley L, Lei M, Kawasaki Y, Sawyer S, Christensen T, Tye BK. Mcm10 and the MCM2-7 complex interact to initiate DNA synthesis and to release replication factors from origins. *Genes Dev* 2000; 14:913-26.
137. Dutta A, Bell SP. Initiation of DNA replication in eukaryotic cells. *Annu Rev Cell Dev Biol* 1997; 13:293-332.
138. Wilmes GM, Bell SP. The B2 element of the *Saccharomyces cerevisiae* ARS1 origin of replication requires specific sequences to facilitate pre-RC formation. *Proc Natl Acad Sci U S A* 2002; 99:101-6.
139. Davey MJ, Indiani C, O'Donnell M. Reconstitution of the Mcm2-7p heterohexamer, subunit arrangement, and ATP site architecture. *J Biol Chem* 2003; 278:4491-9.
140. Kawasaki Y, Kim HD, Kojima A, Seki T, Sugino A. Reconstitution of *Saccharomyces cerevisiae* prereplicative complex assembly in vitro. *Genes Cells* 2006; 11:745-56.

141. Hennessy KM, Clark CD, Botstein D. Subcellular localization of yeast CDC46 varies with the cell cycle. *Genes Dev* 1990; 4:2252-63.
142. Hennessy KM, Lee A, Chen E, Botstein D. A group of interacting yeast DNA replication genes. *Genes Dev* 1991; 5:958-69.
143. Donovan S, Harwood J, Drury LS, Diffley JF. Cdc6p-dependent loading of Mcm proteins onto pre-replicative chromatin in budding yeast. *Proc Natl Acad Sci U S A* 1997; 94:5611-6.
144. Fujita M, Hori Y, Shirahige K, Tsurimoto T, Yoshikawa H, Obuse C. Cell cycle dependent topological changes of chromosomal replication origins in *Saccharomyces cerevisiae*. *Genes Cells* 1998; 3:737-49.
145. Wang B, Feng L, Hu Y, Huang SH, Reynolds CP, Wu L, et al. The essential role of *Saccharomyces cerevisiae* CDC6 nucleotide-binding site in cell growth, DNA synthesis, and Orc1 association. *J Biol Chem* 1999; 274:8291-8.
146. Dziak R, Leishman D, Radovic M, Tye BK, Yankulov K. Evidence for a role of MCM (mini-chromosome maintenance)5 in transcriptional repression of sub-telomeric and Ty-proximal genes in *Saccharomyces cerevisiae*. *J Biol Chem* 2003; 278:27372-81.
147. Rehman MA, Fourel G, Mathews A, Ramdin D, Espinosa M, Gilson E, et al. Differential requirement of DNA replication factors for subtelomeric ARS consensus sequence protosilencers in *Saccharomyces cerevisiae*. *Genetics* 2006; 174:1801-10.
148. Kaplan DL, Davey MJ, O'Donnell M. Mcm4,6,7 uses a "pump in ring" mechanism to unwind DNA by steric exclusion and actively translocate along a duplex. *J Biol Chem* 2003; 278:49171-82.
149. Biswas-Fiss EE, Khopde SM, Biswas SB. The Mcm467 complex of *Saccharomyces cerevisiae* is preferentially activated by autonomously replicating DNA sequences. *Biochemistry* 2005; 44:2916-25.
150. Kramer B, Kramer W, Williamson MS, Fogel S. Heteroduplex DNA correction in *Saccharomyces cerevisiae* is mismatch specific and requires functional PMS genes. *Mol Cell Biol* 1989; 9:4432-40.

151. Alani E. The *Saccharomyces cerevisiae* Msh2 and Msh6 proteins form a complex that specifically binds to duplex oligonucleotides containing mismatched DNA base pairs. *Mol Cell Biol* 1996; 16:5604-15.
152. Studamire B, Quach T, Alani E. *Saccharomyces cerevisiae* Msh2p and Msh6p ATPase activities are both required during mismatch repair. *Mol Cell Biol* 1998; 18:7590-601.
153. Luhr B, Scheller J, Meyer P, Kramer W. Analysis of in vivo correction of defined mismatches in the DNA mismatch repair mutants msh2, msh3 and msh6 of *Saccharomyces cerevisiae*. *Mol Gen Genet* 1998; 257:362-7.
154. Marsischky GT, Lee S, Griffith J, Kolodner RD. 'Saccharomyces cerevisiae MSH2/6 complex interacts with Holliday junctions and facilitates their cleavage by phage resolution enzymes. *J Biol Chem* 1999; 274:7200-6.
155. Habraken Y, Sung P, Prakash L, Prakash S. ATP-dependent assembly of a ternary complex consisting of a DNA mismatch and the yeast MSH2-MSH6 and MLH1-PMS1 protein complexes. *J Biol Chem* 1998; 273:9837-41.
156. Bowers J, Sokolsky T, Quach T, Alani E. A mutation in the MSH6 subunit of the *Saccharomyces cerevisiae* MSH2-MSH6 complex disrupts mismatch recognition. *J Biol Chem* 1999; 274:16115-25.
157. Bowers J, Tran PT, Joshi A, Liskay RM, Alani E. MSH-MLH complexes formed at a DNA mismatch are disrupted by the PCNA sliding clamp. *J Mol Biol* 2001; 306:957-68.
158. Stone JE, Petes TD. Analysis of the proteins involved in the in vivo repair of base-base mismatches and four-base loops formed during meiotic recombination in the yeast *Saccharomyces cerevisiae*. *Genetics* 2006; 173:1223-39.
159. Kanemaki M, Sanchez-Diaz A, Gambus A, Labib K. Functional proteomic identification of DNA replication proteins by induced proteolysis in vivo. *Nature* 2003; 423:720-4.
160. Takayama Y, Kamimura Y, Okawa M, Muramatsu S, Sugino A, Araki H. GINS, a novel multiprotein complex required for chromosomal DNA replication in budding yeast. *Genes Dev* 2003; 17:1153-65.
161. Sundin BA, Chiu CH, Riffle M, Davis TN, Muller EG. Localization of proteins that are coordinately expressed with Cln2 during the cell cycle. *Yeast* 2004; 21:793-800.

162. Allain FH, Yen YM, Masse JE, Schultze P, Dieckmann T, Johnson RC, et al. Solution structure of the HMG protein NHP6A and its interaction with DNA reveals the structural determinants for non-sequence-specific binding. *Embo J* 1999; 18:2563-79.
163. Sidorova J, Breeden L. The MSN1 and NHP6A genes suppress SWI6 defects in *Saccharomyces cerevisiae*. *Genetics* 1999; 151:45-55.
164. Kruppa M, Moir RD, Kolodrubetz D, Willis IM. Nhp6, an HMG1 protein, functions in SNR6 transcription by RNA polymerase III in *S. cerevisiae*. *Mol Cell* 2001; 7:309-18.
165. Fragiadakis GS, Tzamarias D, Alexandraki D. Nhp6 facilitates Aft1 binding and Ssn6 recruitment, both essential for FRE2 transcriptional activation. *Embo J* 2004; 23:333-42.
166. Lopez S, Livingstone-Zatchej M, Jourdain S, Thoma F, Sentenac A, Marsolier MC. High-mobility-group proteins NHP6A and NHP6B participate in activation of the RNA polymerase III SNR6 gene. *Mol Cell Biol* 2001; 21:3096-104.
167. Konrad M. Analysis and in vivo disruption of the gene coding for adenylate kinase (ADK1) in the yeast *Saccharomyces cerevisiae*. *J Biol Chem* 1988; 263:19468-74.
168. Bandlow W, Strobel G, Zoglowek C, Oechsner U, Magdolen V. Yeast adenylate kinase is active simultaneously in mitochondria and cytoplasm and is required for non-fermentative growth. *Eur J Biochem* 1988; 178:451-7.
169. Schricker R, Angermayr M, Strobel G, Klinke S, Korber D, Bandlow W. Redundant mitochondrial targeting signals in yeast adenylate kinase. *J Biol Chem* 2002; 277:28757-64.
170. Schricker R, Magdolen V, Strobel G, Bogengruber E, Breitenbach M, Bandlow W. Strain-dependent occurrence of functional GTP:AMP phosphotransferase (AK3) in *Saccharomyces cerevisiae*. *J Biol Chem* 1995; 270:31103-10.
171. Gu Y, Gordon DM, Amutha B, Pain D. A GTP:AMP phosphotransferase, Adk2p, in *Saccharomyces cerevisiae*. Role of the C terminus in protein folding/stabilization, thermal tolerance, and enzymatic activity. *J Biol Chem* 2005; 280:18604-9.
172. Maitra PK. Glucokinase from yeast. *Methods Enzymol* 1975; 42:25-30.
173. Bisson LF, Fraenkel DG. Involvement of kinases in glucose and fructose uptake by *Saccharomyces cerevisiae*. *Proc Natl Acad Sci U S A* 1983; 80:1730-4.



174. Walsh RB, Kawasaki G, Fraenkel DG. Cloning of genes that complement yeast hexokinase and glucokinase mutants. *J Bacteriol* 1983; 154:1002-4.
175. Clifton D, Walsh RB, Fraenkel DG. Functional studies of yeast glucokinase. *J Bacteriol* 1993; 175:3289-94.
176. Lobo Z, Maitra PK. Physiological role of glucose-phosphorylating enzymes in *Saccharomyces cerevisiae*. *Arch Biochem Biophys* 1977; 182:639-45.
177. Bianconi ML. Calorimetric determination of thermodynamic parameters of reaction reveals different enthalpic compensations of the yeast hexokinase isozymes. *J Biol Chem* 2003; 278:18709-13.
178. De Winde JH, Crauwels M, Hohmann S, Thevelein JM, Winderickx J. Differential requirement of the yeast sugar kinases for sugar sensing in establishing the catabolite-repressed state. *Eur J Biochem* 1996; 241:633-43.
179. Randez-Gil F, Herrero P, Sanz P, Prieto JA, Moreno F. Hexokinase PII has a double cytosolic-nuclear localisation in *Saccharomyces cerevisiae*. *FEBS Lett* 1998; 425:475-8.
180. Rodriguez A, De La Cera T, Herrero P, Moreno F. The hexokinase 2 protein regulates the expression of the *GLK1*, *HXK1* and *HXK2* genes of *Saccharomyces cerevisiae*. *Biochem J* 2001; 355:625-31.
181. Jorgensen P, Nishikawa JL, Breitzkreutz BJ, Tyers M. Systematic identification of pathways that couple cell growth and division in yeast. *Science* 2002; 297:395-400.
182. Palomino A, Herrero P, Moreno F. Rgt1, a glucose sensing transcription factor, is required for transcriptional repression of the *HXK2* gene in *Saccharomyces cerevisiae*. *Biochem J* 2005; 388:697-703.
183. Kaeberlein M, Kirkland KT, Fields S, Kennedy BK. Genes determining yeast replicative life span in a long-lived genetic background. *Mech Ageing Dev* 2005; 126:491-504.
184. Palomino A, Herrero P, Moreno F. Tpk3 and Snf1 protein kinases regulate Rgt1 association with *Saccharomyces cerevisiae* *HXK2* promoter. *Nucleic Acids Res* 2006; 34:1427-38.
185. Ahuatzi D, Riera A, Pelaez R, Herrero P, Moreno F. Hxk2 regulates the phosphorylation state of Mig1 and therefore its nucleocytoplasmic distribution. *J Biol Chem* 2007; 282:4485-93.

186. Helliwell SB, Wagner P, Kunz J, Deuter-Reinhard M, Henriquez R, Hall MN. TOR1 and TOR2 are structurally and functionally similar but not identical phosphatidylinositol kinase homologues in yeast. *Mol Biol Cell* 1994; 5:105-18.
187. Barbet NC, Schneider U, Helliwell SB, Stansfield I, Tuite MF, Hall MN. TOR controls translation initiation and early G1 progression in yeast. *Mol Biol Cell* 1996; 7:25-42.
188. Zheng XF, Schreiber SL. Target of rapamycin proteins and their kinase activities are required for meiosis. *Proc Natl Acad Sci U S A* 1997; 94:3070-5.
189. Powers T, Walter P. Regulation of ribosome biogenesis by the rapamycin-sensitive TOR-signaling pathway in *Saccharomyces cerevisiae*. *Mol Biol Cell* 1999; 10:987-1000.
190. Jiang Y, Broach JR. Tor proteins and protein phosphatase 2A reciprocally regulate Tap42 in controlling cell growth in yeast. *Embo J* 1999; 18:2782-92.
191. Kunz J, Schneider U, Howald I, Schmidt A, Hall MN. HEAT repeats mediate plasma membrane localization of Tor2p in yeast. *J Biol Chem* 2000; 275:37011-20.
192. Schmelzle T, Hall MN. TOR, a central controller of cell growth. *Cell* 2000; 103:253-62.
193. Loewith R, Jacinto E, Wullschleger S, Lorberg A, Crespo JL, Bonenfant D, et al. Two TOR complexes, only one of which is rapamycin sensitive, have distinct roles in cell growth control. *Mol Cell* 2002; 10:457-68.
194. Torres J, Di Como CJ, Herrero E, De La Torre-Ruiz MA. Regulation of the cell integrity pathway by rapamycin-sensitive TOR function in budding yeast. *J Biol Chem* 2002; 277:43495-504.
195. Crespo JL, Powers T, Fowler B, Hall MN. The TOR-controlled transcription activators GLN3, RTG1, and RTG3 are regulated in response to intracellular levels of glutamine. *Proc Natl Acad Sci U S A* 2002; 99:6784-9.
196. Wedaman KP, Reinke A, Anderson S, Yates J, 3rd, McCaffery JM, Powers T. Tor kinases are in distinct membrane-associated protein complexes in *Saccharomyces cerevisiae*. *Mol Biol Cell* 2003; 14:1204-20.
197. Chen EJ, Kaiser CA. LST8 negatively regulates amino acid biosynthesis as a component of the TOR pathway. *J Cell Biol* 2003; 161:333-47.

198. Martin DE, Soulard A, Hall MN. TOR regulates ribosomal protein gene expression via PKA and the Forkhead transcription factor FHL1. *Cell* 2004; 119:969-79.
199. Reinke A, Anderson S, McCaffery JM, Yates J, 3rd, Aronova S, Chu S, et al. TOR complex 1 includes a novel component, Tco89p (YPL180w), and cooperates with Ssd1p to maintain cellular integrity in *Saccharomyces cerevisiae*. *J Biol Chem* 2004; 279:14752-62.
200. Monteiro G, Netto LE. Glucose repression of PRX1 expression is mediated by Tor1p and Ras2p through inhibition of Msn2/4p in *Saccharomyces cerevisiae*. *FEMS Microbiol Lett* 2004; 241:221-8.
201. Dilova I, Aronova S, Chen JC, Powers T. Tor signaling and nutrient-based signals converge on Mks1p phosphorylation to regulate expression of Rtg1.Rtg3p-dependent target genes. *J Biol Chem* 2004; 279:46527-35.
202. Wanke V, Pedruzzi I, Cameroni E, Dubouloz F, De Virgilio C. Regulation of G0 entry by the Pho80-Pho85 cyclin-CDK complex. *Embo J* 2005; 24:4271-8.
203. Dames SA, Mulet JM, Rathgeb-Szabo K, Hall MN, Grzesiek S. The solution structure of the FATC domain of the protein kinase target of rapamycin suggests a role for redox-dependent structural and cellular stability. *J Biol Chem* 2005; 280:20558-64.
204. Zurita-Martinez SA, Cardenas ME. Tor and cyclic AMP-protein kinase A: two parallel pathways regulating expression of genes required for cell growth. *Eukaryot Cell* 2005; 4:63-71.
205. Li H, Tsang CK, Watkins M, Bertram PG, Zheng XF. Nutrient regulates Tor1 nuclear localization and association with rDNA promoter. *Nature* 2006; 442:1058-61.
206. Orlova M, Kanter E, Krakovich D, Kuchin S. Nitrogen availability and TOR regulate the Snf1 protein kinase in *Saccharomyces cerevisiae*. *Eukaryot Cell* 2006; 5:1831-7.
207. Yan G, Shen X, Jiang Y. Rapamycin activates Tap42-associated phosphatases by abrogating their association with Tor complex 1. *Embo J* 2006; 25:3546-55.
208. Chen JC, Powers T. Coordinate regulation of multiple and distinct biosynthetic pathways by TOR and PKA kinases in *S. cerevisiae*. *Curr Genet* 2006; 49:281-93.

209. Reinke A, Chen JC, Aronova S, Powers T. Caffeine targets TOR complex I and provides evidence for a regulatory link between the FRB and kinase domains of Tor1p. *J Biol Chem* 2006; 281:31616-26.
210. Bonawitz ND, Chatenay-Lapointe M, Pan Y, Shadel GS. Reduced TOR signaling extends chronological life span via increased respiration and upregulation of mitochondrial gene expression. *Cell Metab* 2007; 5:265-77.
211. Aronova S, Wedaman K, Anderson S, Yates J, 3rd, Powers T. Probing the membrane environment of the TOR kinases reveals functional interactions between TORC1, actin, and membrane trafficking in *Saccharomyces cerevisiae*. *Mol Biol Cell* 2007; 18:2779-94.
212. Baumann F, Milisav I, Neupert W, Herrmann JM. Ecm10, a novel hsp70 homolog in the mitochondrial matrix of the yeast *Saccharomyces cerevisiae*. *FEBS Lett* 2000; 487:307-12.
213. Sakasegawa Y, Hachiya NS, Tsukita S, Kaneko K. Ecm10p localizes in yeast mitochondrial nucleoids and its overexpression induces extensive mitochondrial DNA aggregations. *Biochem Biophys Res Commun* 2003; 309:217-21.
214. Schilke B, Forster J, Davis J, James P, Walter W, Laloraya S, et al. The cold sensitivity of a mutant of *Saccharomyces cerevisiae* lacking a mitochondrial heat shock protein 70 is suppressed by loss of mitochondrial DNA. *J Cell Biol* 1996; 134:603-13.
215. Knight SA, Sepuri NB, Pain D, Dancis A. Mt-Hsp70 homolog, Ssc2p, required for maturation of yeast frataxin and mitochondrial iron homeostasis. *J Biol Chem* 1998; 273:18389-93.
216. Knieszner H, Schilke B, Dutkiewicz R, D'Silva P, Cheng S, Ohlson M, et al. Compensation for a defective interaction of the hsp70 ssq1 with the mitochondrial Fe-S cluster scaffold isu. *J Biol Chem* 2005; 280:28966-72.
217. Dutkiewicz R, Marszalek J, Schilke B, Craig EA, Lill R, Muhlenhoff U. The Hsp70 chaperone Ssq1p is dispensable for iron-sulfur cluster formation on the scaffold protein Isu1p. *J Biol Chem* 2006; 281:7801-8.
218. Matouschek A, Rospert S, Schmid K, Glick BS, Schatz G. Cyclophilin catalyzes protein folding in yeast mitochondria. *Proc Natl Acad Sci U S A* 1995; 92:6319-23.

219. Lamb DC, Kelly DE, Manning NJ, Kaderbhai MA, Kelly SL. Biodiversity of the P450 catalytic cycle: yeast cytochrome b5/NADH cytochrome b5 reductase complex efficiently drives the entire sterol 14-demethylation (CYP51) reaction. *FEBS Lett* 1999; 462:283-8.
220. Beilharz T, Egan B, Silver PA, Hofmann K, Lithgow T. Bipartite signals mediate subcellular targeting of tail-anchored membrane proteins in *Saccharomyces cerevisiae*. *J Biol Chem* 2003; 278:8219-23.
221. Choi JH, Lou W, Vancura A. A novel membrane-bound glutathione S-transferase functions in the stationary phase of the yeast *Saccharomyces cerevisiae*. *J Biol Chem* 1998; 273:29915-22.
222. Adamis PD, Gomes DS, Pinto ML, Panek AD, Eleutherio EC. The role of glutathione transferases in cadmium stress. *Toxicol Lett* 2004; 154:81-8.
223. Iwahashi H, Kitagawa E, Suzuki Y, Ueda Y, Ishizawa YH, Nobumasa H, et al. Evaluation of toxicity of the mycotoxin citrinin using yeast ORF DNA microarray and Oligo DNA microarray. *BMC Genomics* 2007; 8:95.
224. Anderson RM, Bitterman KJ, Wood JG, Medvedik O, Sinclair DA. Nicotinamide and PNC1 govern lifespan extension by calorie restriction in *Saccharomyces cerevisiae*. *Nature* 2003; 423:181-5.
225. Lin SJ, Ford E, Haigis M, Liszt G, Guarente L. Calorie restriction extends yeast life span by lowering the level of NADH. *Genes Dev* 2004; 18:12-6.
226. van Loon AP, Pesold-Hurt B, Schatz G. A yeast mutant lacking mitochondrial manganese-superoxide dismutase is hypersensitive to oxygen. *Proc Natl Acad Sci U S A* 1986; 83:3820-4.
227. Ravindranath SD, Fridovich I. Isolation and characterization of a manganese-containing superoxide dismutase from yeast. *J Biol Chem* 1975; 250:6107-12.
228. Longo VD, Liou LL, Valentine JS, Gralla EB. Mitochondrial superoxide decreases yeast survival in stationary phase. *Arch Biochem Biophys* 1999; 365:131-42.
229. Fabrizio P, Pozza F, Pletcher SD, Gendron CM, Longo VD. Regulation of longevity and stress resistance by Sch9 in yeast. *Science* 2001; 292:288-90.

230. Fabrizio P, Pletcher SD, Minois N, Vaupel JW, Longo VD. Chronological aging-independent replicative life span regulation by Msn2/Msn4 and Sod2 in *Saccharomyces cerevisiae*. *FEBS Lett* 2004; 557:136-42.
231. O'Brien KM, Dirmeier R, Engle M, Poyton RO. Mitochondrial protein oxidation in yeast mutants lacking manganese-(MnSOD) or copper- and zinc-containing superoxide dismutase (CuZnSOD): evidence that MnSOD and CuZnSOD have both unique and overlapping functions in protecting mitochondrial proteins from oxidative damage. *J Biol Chem* 2004; 279:51817-27.
232. Manfredini V, Duarte Martins V, Ruaro Peralba Mdo C, Silveira Benfato M. Adaptive response to enhanced basal oxidative damage in sod mutants from *Saccharomyces cerevisiae*. *Mol Cell Biochem* 2005; 276:175-81.
233. Luk E, Yang M, Jensen LT, Bourbonnais Y, Culotta VC. Manganese activation of superoxide dismutase 2 in the mitochondria of *Saccharomyces cerevisiae*. *J Biol Chem* 2005; 280:22715-20.
234. McAlister L, Holland MJ. Differential expression of the three yeast glyceraldehyde-3-phosphate dehydrogenase genes. *J Biol Chem* 1985; 260:15019-27.
235. Athenstaedt K, Zweytick D, Jandrositz A, Kohlwein SD, Daum G. Identification and characterization of major lipid particle proteins of the yeast *Saccharomyces cerevisiae*. *J Bacteriol* 1999; 181:6441-8.
236. Delgado ML, O'Connor JE, Azorin I, Renau-Piqueras J, Gil ML, Gozalbo D. The glyceraldehyde-3-phosphate dehydrogenase polypeptides encoded by the *Saccharomyces cerevisiae* TDH1, TDH2 and TDH3 genes are also cell wall proteins. *Microbiology* 2001; 147:411-7.
237. Pedrajas JR, Kosmidou E, Miranda-Vizuete A, Gustafsson JA, Wright AP, Spyrou G. Identification and functional characterization of a novel mitochondrial thioredoxin system in *Saccharomyces cerevisiae*. *J Biol Chem* 1999; 274:6366-73.
238. Bao R, Chen YX, Zhang Y, Zhou CZ. Expression, purification, crystallization and preliminary X-ray diffraction analysis of mitochondrial thioredoxin Trx3 from *Saccharomyces cerevisiae*. *Acta Crystallogr Sect F Struct Biol Cryst Commun* 2006; 62:1161-3.

239. Buttner S, Ruli D, Vogtle FN, Galluzzi L, Moitzi B, Eisenberg T, et al. A yeast BH3-only protein mediates the mitochondrial pathway of apoptosis. *EMBO J* 2011; 30:2779-92.
